# Supplementary material for: Identifying and characterizing demersal fish biodiversity hotspots in the Benguela Current Large Marine Ecosystem: relevance in the light of global changes
Source: Oxford University Press journal article supplement (doi:10.1093/icesjms/fst040), 2013-05-22
Supplement: fst040supp.doc [file fst040supp.doc]

**Supplementary material**

Figure S1. Plots species richness-depth response curves, broken down for the shorter time periods for (a) Angola, (b) Namibia and (c) South Africa

Figure S2. Result of GAMs used to predict species richness for the shorter time periods in (a) Angola, (b) Namibia and (c) South Africa, showing the Plots of GAM smoothed response surfaces of species richness as a function of geographic locations (longitude and latitude),

Figure S3. Plots of the best variogram models used to determine the parameters for modelling species richness per time period in (a) Angola, (b) Namibia and (c) South Africa, using KED.

Figure S4. KED spatial predictions of species richness in (a) Angola and (b) South Africa, broken down for the shorter time periods for each country.

Figure S5. Box-Whisker plots of bottom temperature associated with different quantiles of species richness for each country, according to KED predictions.
